# Supplementary material
Source: ML conference proceedings conference paper supplement (https://openaccess.thecvf.com/content/CVPR2026/html/Jiang_Proxy3D_Efficient_3D_CVPR_2026_paper.html)
Supplement: Supplementary file 1 [file Jiang_Proxy3D_Efficient_3D_CVPR_2026_supplemental.pdf]

# Proxy3D: Efficient 3D Representations for Vision-Language Models via Semantic Clustering and Alignment

## Supplementary Material

### A. Implementation and Dataset Details

**Training details.** Table 1 shows details and hyperparameters for the proposed Proxy3D training with four stages. We employ  $8 \times$  A6000 GPUs, and a complete training takes approximately 2 days. We train both the 3D embeddings including conventional positional and the proposed spatial embeddings with the language model (LM) during stages I-II and only the language model in stages III-IV.

Table 1. Training details and hyperparameters for each stage.

| Stage              | I                                          | II  | III          | IV  |
|--------------------|--------------------------------------------|-----|--------------|-----|
| Trainable modules  | 3D emb. + LM                               |     | LM           |     |
| Frozen modules     | -                                          |     | 3D emb. + LM |     |
| Global batch size  | 256                                        | 256 | 256          | 128 |
| Accumulation steps | 1                                          | 1   | 1            | 2   |
| Number of epochs   | 1                                          | 3   | 3            | 1   |
| Learning schedule  | cosine with 5e-6 rate and 0.1 warmup ratio |     |              |     |

**Dataset details.** Detailed information about our SpaceSpan dataset splits and question types is reported in Table 2. Distribution of questions and dataset sources are illustrated in Figures 1-2.

Table 2. SpaceSpan dataset details. Text, ID, Num. and MC stands for textual, identifier, numerical and multiple choice answering formats, respectively.

| Name           | Text | ID  | Num. | MC  |
|----------------|------|-----|------|-----|
| ScanQA[1]      | 26K  | 0   | 0    | 0   |
| SQA3D[8]       | 26K  | 0   | 0    | 0   |
| Scan2Cap[3]    | 32K  | 0   | 0    | 0   |
| ScanRefer[2]   | 0    | 32K | 0    | 0   |
| Multi3DRef[11] | 0    | 39K | 0    | 0   |
| MMScan[7]      | 57K  | 57K | 0    | 0   |
| SR-91K[9]      | 0    | 0   | 30K  | 20K |

**Complexity analysis.** As presented in Table 3, as compared to vision encoder processing time, clustering takes relatively small portion of time. The token compression, however, leads to significant reduction of 30% in inference time. This implies the effectiveness of reducing token number in improving MLLM inference efficiency.

### B. Additional Qualitative Results

**Visualization of attention for proxy tokens.** We aggregate queries for each proxy token in the last output layer

Table 3. Latency (sec) for batch size of 8 and 16. OOM in table refers to out-of-memory run.

| Batch size | Vision Encoder |      | Cluster. |     | LLM |     | Latency Per Question |            |
|------------|----------------|------|----------|-----|-----|-----|----------------------|------------|
|            | 8              | 16   | 8        | 16  | 8   | 16  | 8                    | 16         |
| Qwen2.5-VL | 9.4            | 16.2 | -        | -   | 9.3 | OOM | 2.25                 | OOM        |
| Ours       | 9.4            | 16.2 | 2.9      | 5.6 | 1.1 | 1.5 | <b>1.75</b>          | <b>1.5</b> |

across all tokens to estimate a normalized 3D proxy attention map, as shown in Figure 3. The attention of the last layer has been selected because it contains all information in the network related to 3D reasoning task. Figure 3 shows that Proxy3D is able not only to assign attention to objects of interest but also to draw attention to related objects, indicating the emergence of spatial reasoning.

**Failure case analysis.** Often, failure cases originate from innate problems within datasets, such as questions that have multiple candidate answers and annotation errors in ScanNet-based benchmarks as shown in Figure 4. These problems require manual corrections which is also described in other analyses [4, 5].

**More visualization samples.** We provide additional visualization samples in Figure 5. Proxy3D is also deft at capturing small objects, establishing strong spatial consistencies and detailed 3D vision.

**Limitations and future work.** Though Proxy3D performs well in 3D QA, 3D VG and spatial reasoning tasks, we still have not fully reached its potential in spatiotemporal tasks. In addition, we did not utilize post-training reward learning, which is a common way to further improve performance metrics [6, 10]. In general, spatial reasoning for outdoor scenes is an underexplored but practically important application for future work.

### References

- [1] Daichi Azuma, Taiki Miyanishi, Shuhei Kurita, and Motoaki Kawanabe. ScanQA: 3D question answering for spatial scene understanding. In *CVPR*, 2022. 1
- [2] Dave Zhenyu Chen, Angel X Chang, and Matthias Nießner. Scanrefer: 3D object localization in rgb-d scans using natural language. In *ECCV*, 2020. 1
- [3] Zhenyu Chen, Ali Gholami, Matthias Niessner, and Angel X. Chang. Scan2Cap: Context-aware dense captioning in RGB-D scans. In *CVPR*, 2021. 1



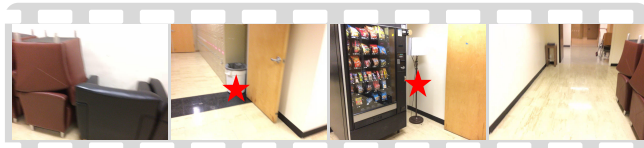

### Multiple Answers

**Question:** What is in the corner, to the left of the door?  
Answer the question using a single word or phrase.

**Answer:** Trash Bin. 😊 **GroundTruth:** Lamp. 😊

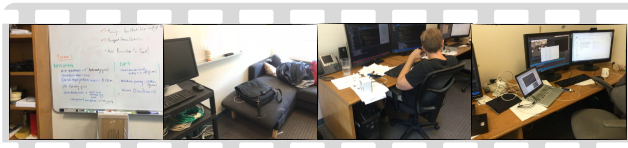

### Annotation Error

**Question:** I am leaning on the whiteboard with a cart to my right and a couch to my left. Is the clothing on the couch or the desk closer to me?

**Answer:** Couch. 😊 **GroundTruth:** clothing. 🤔

Figure 4. **Dataset-related failure cases in Scannet-based benchmarks.** These benchmarks demonstrate flaws in question design, with questions that has multiple candidate answers and annotation errors.

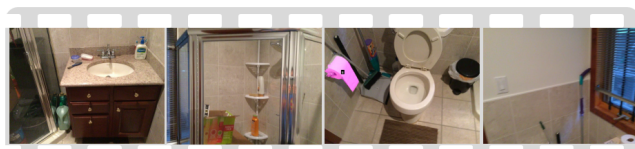

### Dense Captioning

**Question:** Provide a detailed description of the appearance of <OBJ008> before analyzing its spatial connections with other elements in the scene.

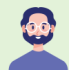

**Answer:** This is a white toilet paper roll. It is to the left of the toilet. ✓

**Ground Truth:** There is a roll of toilet paper. It is on the wall to the left of the toilet. 🤖

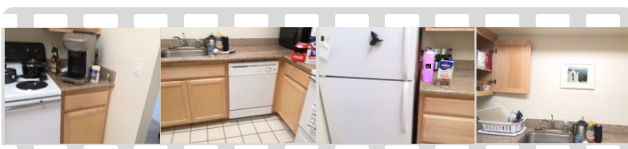

### Visual Grounding

**Question:** Are there any objects that correspond to the description "a water bottle is situated on the counter to the right of a refrigerator"? If yes, could you share the IDs for those objects?

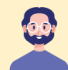

**Answer:** Yes. <OBJ063>. ✓

**Ground Truth:** <OBJ063>. 🤖

Figure 5. **More visual samples on the success of Proxy3D.** Proxy3D is not only able to accurately locate large objects, but also track small objects with few occurrences.

Spatial-MLLM: Boosting MLLM capabilities in visual-based spatial intelligence. In *NeurIPS*, 2025. 1

- [11] Yiming Zhang, ZeMing Gong, and Angel X Chang. Multi3DRefer: Grounding text description to multiple 3d objects. In *ICCV*, 2023. 1
